# Supplementary material
Source: Springer Nature journal article supplement (https://www.springermedizin.de/resource/supplementary/12879_2008_664_MOESM4_ESM.pdf/9449458)
Supplement: MOESM4 [file 9449458]

**Table 2 – Summary of diagnostic performance in the detection of IPA.**

| <b>Diagnostic assay</b>     | <b>BAL fraction</b>           | <b>Sensitivity (%)</b> | <b>Specificity (%)</b> | <b>Positive Predictive Value (%)</b> | <b>Negative Predictive Value (%)</b> | <b>Positive Likelihood Ratio</b> | <b>Negative Likelihood Ratio</b> |
|-----------------------------|-------------------------------|------------------------|------------------------|--------------------------------------|--------------------------------------|----------------------------------|----------------------------------|
| <b>qPCR, 13 fg</b>          | <b>pellet</b>                 | <b>76.9</b> (50 – 92)  | <b>87.7</b> (79 – 93)  | <b>58</b>                            | <b>94</b>                            | <b>8.63</b> (3.2 – 11.9)         | <b>0.33</b> (0.1 – 0.7 )         |
| <b>qPCR, 13 fg</b>          | <b>supernatant</b>            | <b>40</b> (17 – 69)    | <b>97.3</b> (86 – 99)  | <b>80.02</b>                         | <b>85.70</b>                         | <b>14.8</b> (1.9 – 118.1)        | <b>0.62</b> (0.37 – 1 )          |
| <b>Culture</b>              | <b>whole (unfractionated)</b> | <b>84.6</b> (58 – 96)  | <b>100</b> (95 – 100)  | <b>100</b>                           | <b>97.6</b>                          | <b>infinity</b>                  | <b>0.15</b> (0.04 – 0.6 )        |
| <b>Histology</b>            | <b>whole (unfractionated)</b> | <b>53.8</b> (29 – 77)  | <b>100</b> (95 – 100)  | <b>100</b>                           | <b>93.1</b>                          | <b>infinity</b>                  | <b>0.46</b> (0.3 – 0.8)          |
| <b>Culture or Histology</b> | <b>whole (unfractionated)</b> | <b>85.7</b> (60 – 96)  | <b>100</b> (95 – 100)  | <b>100</b>                           | <b>97.7</b>                          | <b>infinity</b>                  | <b>0.99</b> (0.04 – 0.5)         |
